# Supplementary material for: An Experimental Study on the Hot Alkali Extraction of Xylan-Based Hemicelluloses from Wheat Straw and Corn Stalks and Optimization Methods
Source: MDPI journal article supplement (doi:10.3390/polym14091662), 2022-04-20
Supplement: s1 [file s1]

## Supplementary material, 2<sup>nd</sup> revision

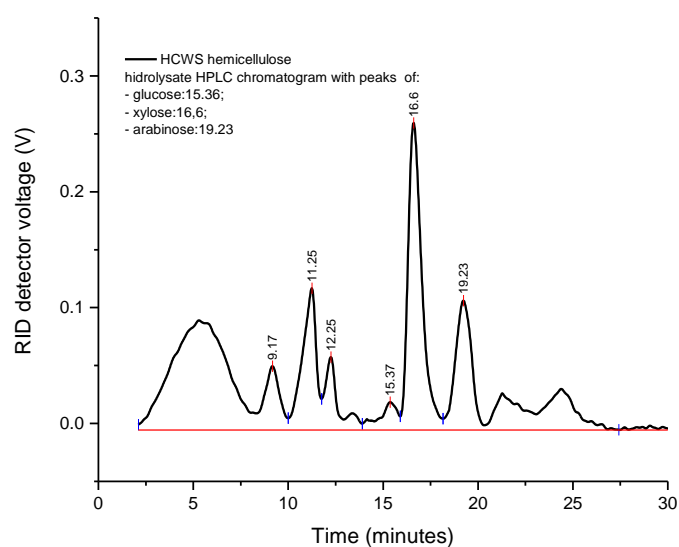

**Figure S1** HPLC chromatogram of neutralized HCWS hemicellulose acid hydrolysate

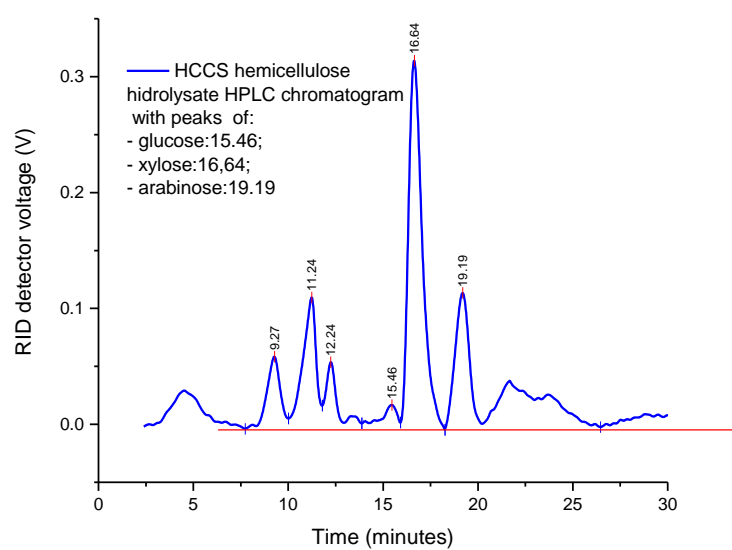

**Figure S2** HPLC chromatogram of neutralized HCCS hemicellulose acid hydrolysate

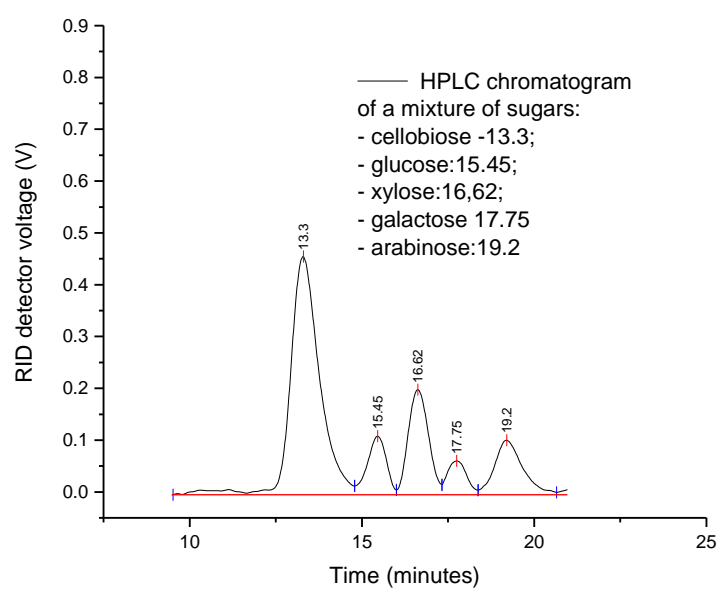

**Figure S3** HPLC chromatogram of monosaccharide mixture containing cellobiose ( $0.063\text{g}\cdot\text{L}^{-1}$ ), glucose ( $0.024\text{g}\cdot\text{L}^{-1}$ ), xylose ( $0.052\text{g}\cdot\text{L}^{-1}$ ), galactose ( $0.045\text{g}\cdot\text{L}^{-1}$ ) and arabinose ( $0.023\text{g}\cdot\text{L}^{-1}$ ) –injection volume 25uL

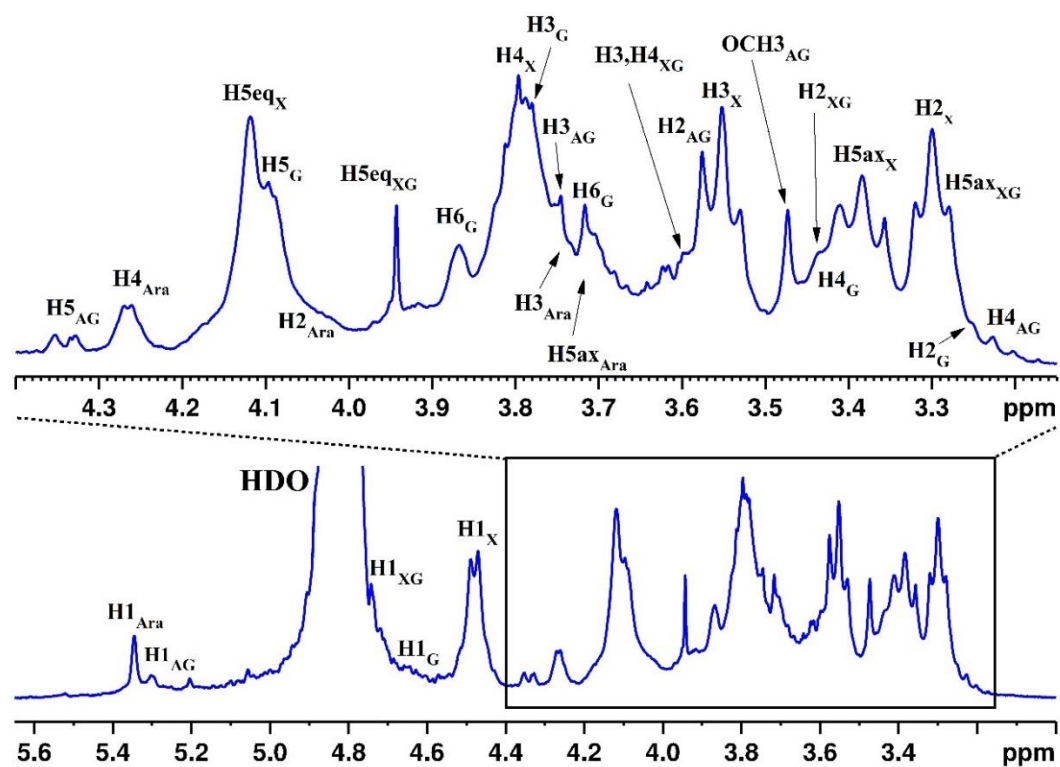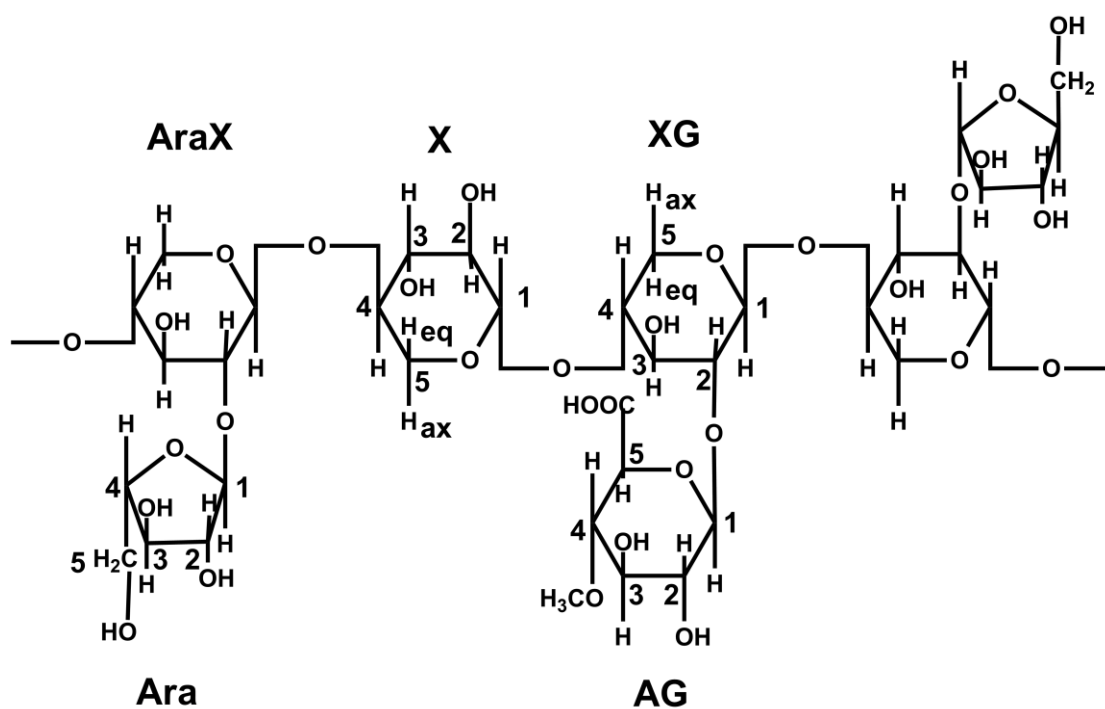

**Figure S4:**  $^1\text{H}$  NMR spectrum of HCWS sample with signals assignment, recorded in  $\text{D}_2\text{O}$ , and the labeled chemical structural units.

**Table S1:**  $^1\text{H}$  NMR Signals assignment of hemicelluloses samples extracted from HCWS and HCCS in  $\text{D}_2\text{O}$

| Hemicelluloses        | Monosaccharide units                                | Position          | $\delta \text{ } ^1\text{H}$ (ppm) |
|-----------------------|-----------------------------------------------------|-------------------|------------------------------------|
| Methylglucuronoxylans | $\beta$ -Xylose non-substituted ( <b>X</b> )        | 1                 | 4.48                               |
|                       |                                                     | 2                 | 3.30                               |
|                       |                                                     | 3                 | 3.55                               |
|                       |                                                     | 4                 | 3.80                               |
|                       |                                                     | 5 <sub>ax</sub>   | 3.38                               |
|                       |                                                     | 5 <sub>eq</sub>   | 4.12                               |
|                       | $\beta$ -Xylose substituted ( <b>XG</b> )           | 1                 | 4.74                               |
|                       |                                                     | 2                 | 3.43                               |
|                       |                                                     | 3                 | 3.60                               |
|                       |                                                     | 4                 | 3.60                               |
|                       |                                                     | 5 <sub>ax</sub>   | 3.28                               |
|                       |                                                     | 5 <sub>eq</sub>   | 3.94                               |
|                       | 4-O-Methyl- $\alpha$ -Glucuronic acid ( <b>AG</b> ) | 1                 | 5.30                               |
|                       |                                                     | 2                 | 3.58                               |
|                       |                                                     | 3                 | 3.75                               |
|                       |                                                     | 4                 | 3.23                               |
|                       |                                                     | 5                 | 4.34                               |
|                       |                                                     | -COOH             | -                                  |
|                       |                                                     | -OCH <sub>3</sub> | 3.47                               |
|                       | $\beta$ -Glucose ( <b>G</b> )                       | 1                 | 4.60                               |
|                       |                                                     | 2                 | 3.26                               |
|                       |                                                     | 3                 | 3.78                               |
|                       |                                                     | 4                 | 3.43                               |
|                       |                                                     | 5                 | 4.10                               |
|                       |                                                     | 6                 | 3.72 and 3.87                      |
